# Supplementary material for: Cognitive benefits of using non-invasive compared to implantable neural feedback
Source: PubMed Central journal article supplement (PMC9537330; doi:10.1038/s41598-022-21057-y), 2022-10-06
Supplement: 41598_2022_21057_MOESM1_ESM.pdf [file 41598_2022_21057_MOESM1_ESM.pdf]

## Supplementary Materials

# Cognitive benefits of using non-invasive compared to implantable neural feedback

Lauren Chee<sup>1,+</sup>, Giacomo Valle<sup>1,+</sup>, Greta Preatoni<sup>1</sup>, Chiara Basla<sup>1</sup>, Michele Marazzi<sup>1</sup>, and Stanisa Raspopovic<sup>1,\*</sup>

<sup>1</sup> Laboratory for Neuroengineering, Department of Health Science and Technology, Institute for Robotics and Intelligent Systems, ETH Zürich, 8092 Zürich, Switzerland

[\\*stanisa.raspopovic@hest.ethz.ch](mailto:stanisa.raspopovic@hest.ethz.ch)

\*these authors contributed equally to this work

### Tables

|     | Sum of Squared Residuals (SSE) | R-squared | Root Mean Square Error (RMSE) |
|-----|--------------------------------|-----------|-------------------------------|
| NI1 | 0.139                          | 0.9223    | 0.1243                        |
| NI2 | 0.8546                         | 0.8384    | 0.135                         |

**Table S1.** JNDs Goodness of Fit for NI subjects

|      | Stimulation Channel | Pulse-width ( $\mu\text{s}$ ) |     |     |     | Amplitude (mA) |
|------|---------------------|-------------------------------|-----|-----|-----|----------------|
|      |                     | L1                            | L2  | L3  | L4  |                |
| NI 1 | Ch 1                | 136                           | 198 | 278 | 391 | 7              |
|      | Ch 2                | 140                           | 196 | 278 | 390 | 7              |
|      | Ch 3                | 134                           | 190 | 267 | 374 | 11             |
|      | Ch 4                | 134                           | 191 | 278 | 390 | 10             |

**Table S2.** Stimulation Pulse-Widths and Amplitudes for Subject NI1.

Figures

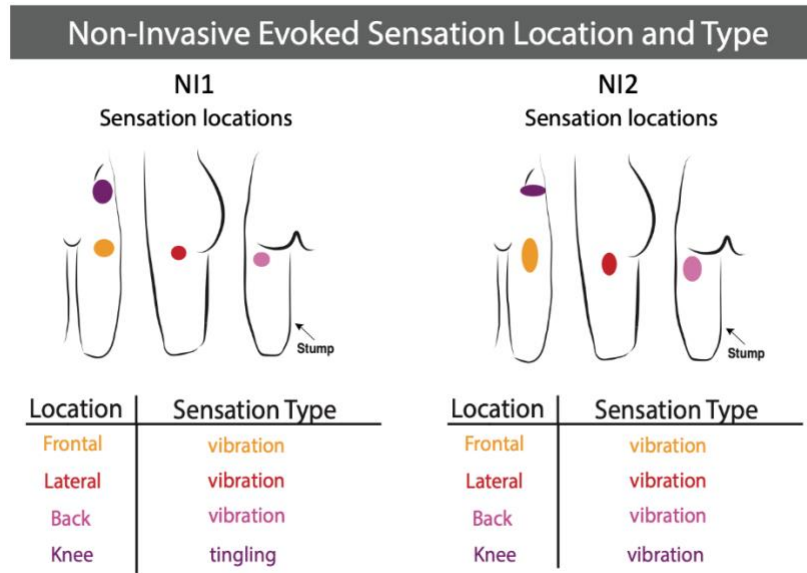

**Figure S1 Non-Invasive Sensation Characterization.** Perceived sensation locations and types in NI subjects.

## Electrically-Evoked Sensation Characterization Extended Results

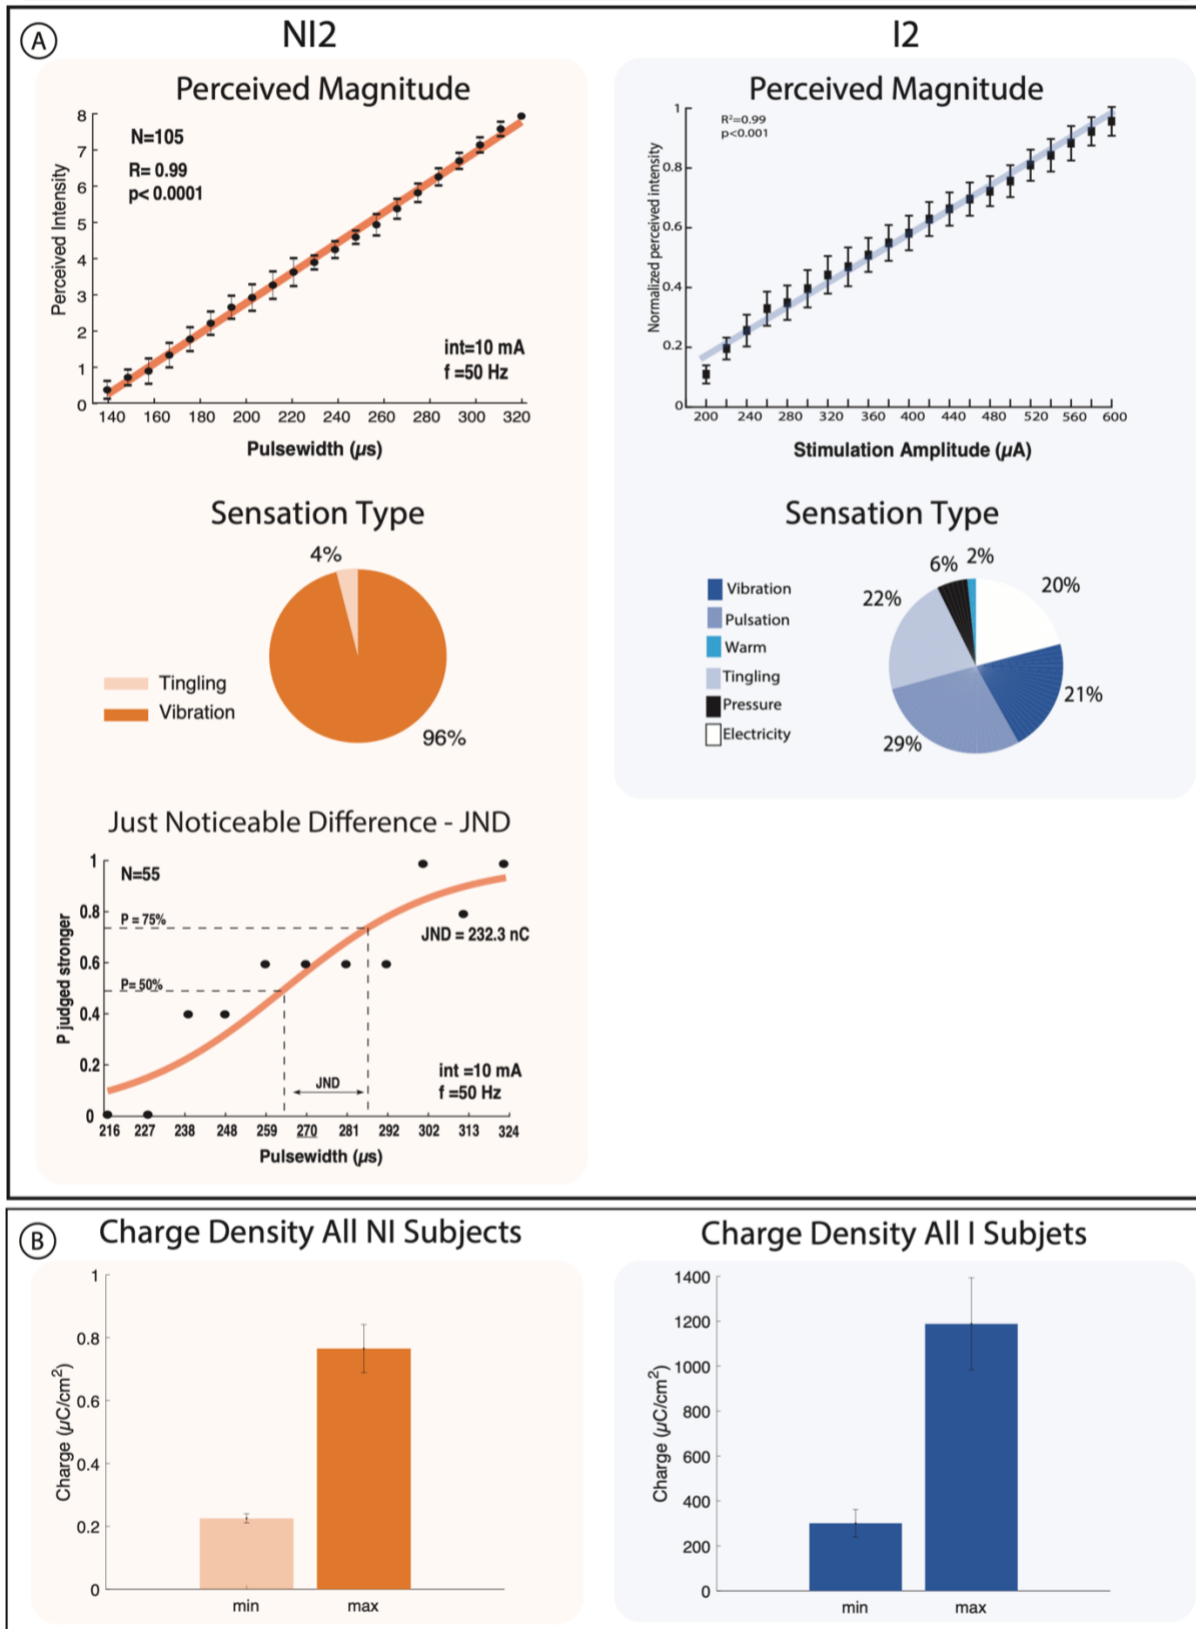

**Figure S2 Electrically-Evoked Sensation Characterization Extended results.** (A) Electrical charge sensitivity, perceived intensity of charge, and sensation type for NI2 and I2. (B) Charge Density in all NI and I subjects.

## Passive Task Performance with Sensory Feedback Compared to Control

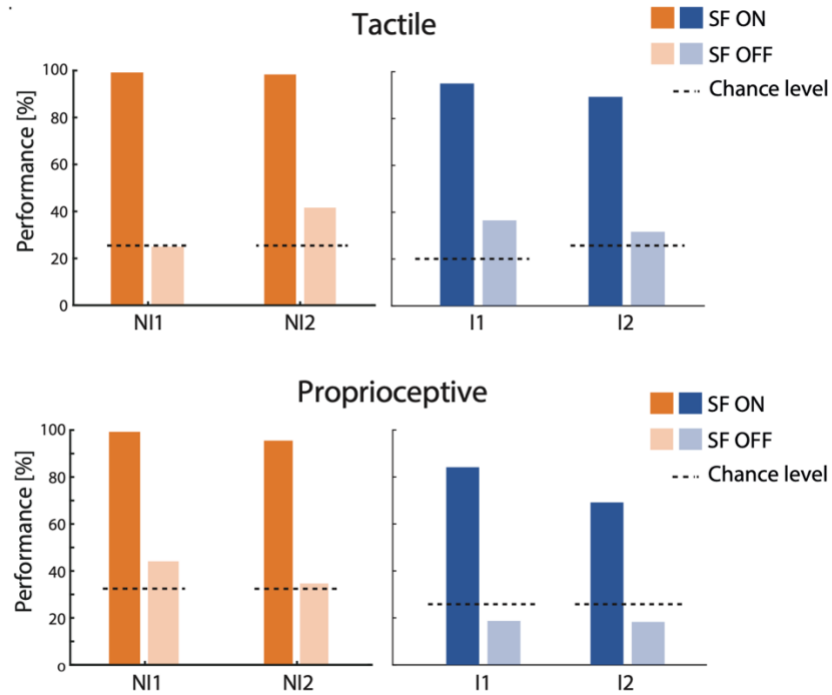

**Figure S3. Passive Task Control Conditions.** Correct passive identification of touched location or flexion level for Non-invasive subjects NI1, NI2 and invasive subjects I1, I2.

## No Change in Prosthesis Weight Perception with Non-Invasive Feedback

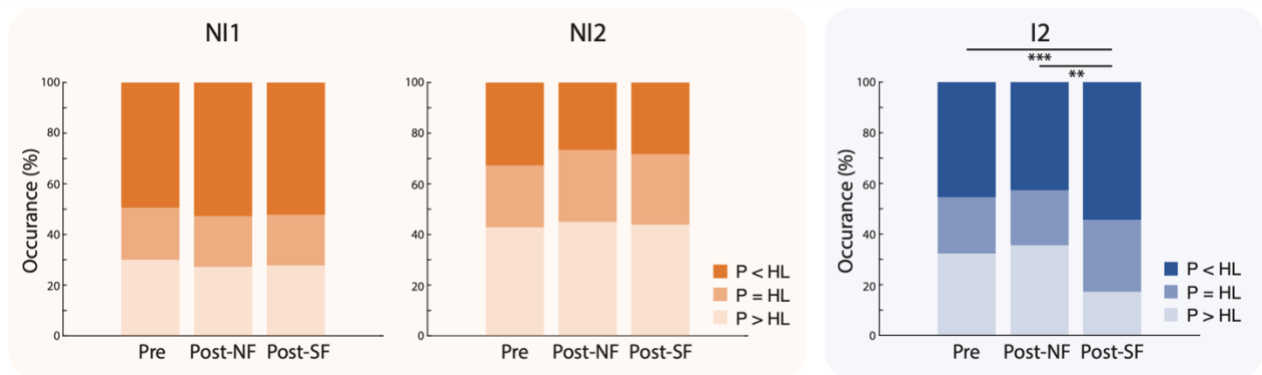

**Figure S4. Prosthesis Weight Perception Relative to Healthy Leg.** Occurrence of response to the question “Which leg is heavier”. P = prosthetic, HL = healthy leg. Statistical significance is marked with \* $p < 0.05$ , \*\* $p < 0.01$ , \*\*\* $p < 0.001$ .

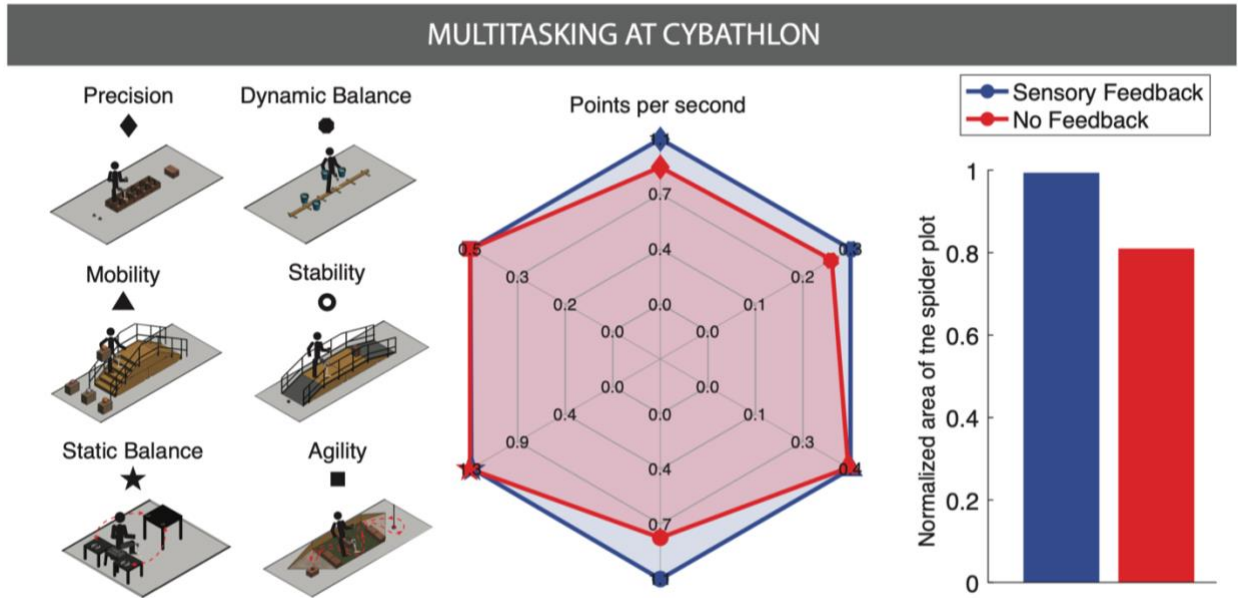

**Figure S5. Daily Life Task Performance at Cybathlon.** Points per second achieved in each of the daily life tasks at Cybathlon are plotted in a spider plot and compared with and without sensory feedback for NI1

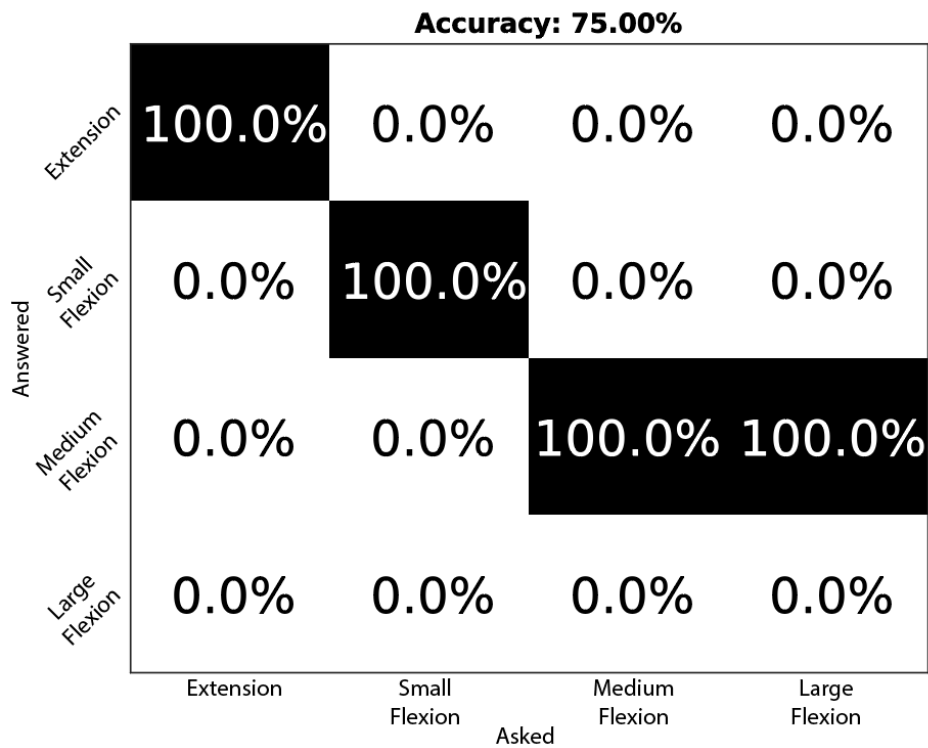

**Figure S6. NI1 flexion level task performance with 4 levels.** Corresponding levels of charge injected can be found in Table S2 in the CH 1 row.
